# Supplementary material for: Microbial Recycling of Bioplastics via Mixed-Culture Fermentation of Hydrolyzed Polyhydroxyalkanoates into Carboxylates
Source: MDPI journal article supplement (doi:10.3390/ma16072693), 2023-03-28
Supplement: s1 [file s1]

# Microbial Recycling of Bioplastics via Mixed-Culture Fermentation of Hydrolyzed Polyhydroxyalkanoates into Carboxylates

Yong Jin <sup>1</sup>, Kasper D. de Leeuw <sup>1,2</sup>, and David P. B. T. B. Strik <sup>1,\*</sup>

<sup>1</sup> Environmental Technology, Wageningen University & Research,  
6708 WG Wageningen, The Netherlands; yong.jin@wur.nl (Y.J.); kasper.deleeuw@wur.nl (K.D.d.L.)  
<sup>2</sup> ChainCraft B.V., 1043 AP Amsterdam, The Netherlands  
\* Correspondence: david.strik@wur.nl

**Table S1.** Typical material properties of PHBV [1].

| Item                             | Data      | Test Standard                            |
|----------------------------------|-----------|------------------------------------------|
| Specific gravity                 | 1.25      | ISO 1183-3:1999                          |
| Melt flow index                  | 12-25     | ISO 1133:1997, g/10 min, 190 °C, 2.16 kg |
| Yield stress (MPa)               | 31-36     | ISO 527-1:1993                           |
| Tensile strength (MPa)           | 39        | ISO 527-1:1993                           |
| Elongation at break (%)          | 3.8       | ISO 527-1:1993                           |
| Young's modulus (MPa)            | 160–2100  | ISO 527-1:1993                           |
| Flexural modulus (MPa)           | 2200–2900 | ISO 178:1993                             |
| Vicat softening temperature (°C) | 166       | ISO 306:1994                             |
| Izod impact (J/m)                | 55–60     | ISO 180:2000                             |
| Heat deflection temperature (°C) | 157–165   | ISO 75-2:2003                            |
| DSC melting point (°C)           | 175–180   | ISO 11357-3:1999                         |

---

**Table S2.** Compositions of stock solutions used to prepare medium for mixed culture fermentation of PHBV.

| Compound                                            | Concentration (g/L) | Dilution Factor |
|-----------------------------------------------------|---------------------|-----------------|
| Stock solution I-Minerals                           |                     |                 |
| NH <sub>4</sub> H <sub>2</sub> PO <sub>4</sub>      | 180                 | 50×             |
| MgCl <sub>2</sub> ·6H <sub>2</sub> O                | 16.5                |                 |
| MgSO <sub>4</sub> ·7H <sub>2</sub> O                | 10                  |                 |
| Stock solution II-Minerals                          |                     |                 |
| CaCl <sub>2</sub> ·2H <sub>2</sub> O                | 10                  | 50×             |
| KCl                                                 | 7.5                 |                 |
| Trace metals                                        |                     |                 |
| FeCl <sub>2</sub> ·4H <sub>2</sub> O                | 30.0                | 2000×           |
| MnCl <sub>2</sub> ·4H <sub>2</sub> O                | 0.6                 |                 |
| H <sub>3</sub> BO <sub>3</sub>                      | 6.0                 |                 |
| CoCl <sub>2</sub> ·6H <sub>2</sub> O                | 4.0                 |                 |
| CuCl <sub>2</sub> ·H <sub>2</sub> O                 | 0.2                 |                 |
| NiCl <sub>2</sub> ·6H <sub>2</sub> O                | 0.4                 |                 |
| ZnSO <sub>4</sub> ·7H <sub>2</sub> O                | 2.0                 |                 |
| Na <sub>2</sub> MoO <sub>4</sub> ·2H <sub>2</sub> O | 0.6                 |                 |
| Na <sub>2</sub> SeO <sub>3</sub>                    | 0.2                 |                 |
| EDTA                                                | 12.4                |                 |
| Vitamins                                            |                     |                 |
| Biotin                                              | 0.106               | 1000×           |
| Folic acid                                          | 0.005               |                 |
| Pyridoxal-HCl                                       | 0.0025              |                 |
| Lipoic acid                                         | 0.015               |                 |
| Riboflavin                                          | 0.0125              |                 |
| Thiamine-HCl                                        | 0.266               |                 |
| Ca-D-pantothenate                                   | 0.413               |                 |
| Cyanocobalamin                                      | 0.0125              |                 |
| P-aminobenzoic acid                                 | 0.0125              |                 |
| Nicotinic acid                                      | 0.0125              |                 |
| Supplements                                         |                     |                 |
| Yeast extract                                       | 0.1                 |                 |
| HCl                                                 | 1 M                 |                 |
| KOH                                                 | 4 M                 |                 |

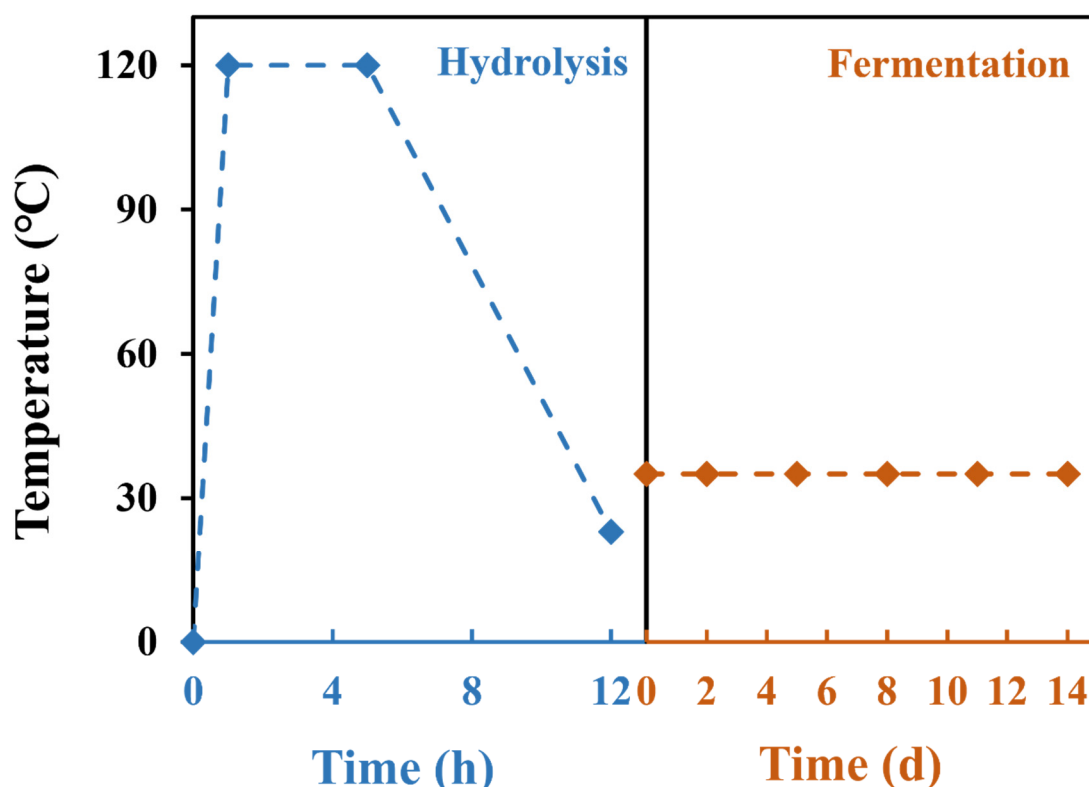

**Figure S1.** Temperature changes in thermal hydrolysis and fermentation process.

**Table S3.** Total Chemical Oxygen Demand (TCOD).

| Material     | Test | COD (g/kg) | Average COD (g/kg) |
|--------------|------|------------|--------------------|
| PHBV (2% HV) | A    | 1570       | 1588               |
|              | B    | 1605       |                    |

a. To determine the chemical oxygen demand z. B. according to DIN 38409/German standard procedure H41. b. Digestion in the aluminum heating block with precise temperature control. c. Heat samples to 148 °C in less than 10 min.

#### Calculations S1. Estimated COD recovery for a potential PHA to PHA recycling process

The PHA to PHA recovery percentage was calculated according:

$$PHA_{recovery} = (Yield_{PHA\ hydrolysis} - Yield_{biomass}) * Yield_{PHA\ from\ VFA} * 100\% \quad [\%] \quad (S1)$$

where by the following targets or experimental findings were used:

Yield<sub>crotonate+3-HB from PHA</sub> = 1 [g crotonate+3HB-COD/g PHA-COD];

Yield<sub>PHA from VFA</sub>: 0.61-0.68 [g PHA-COD/g VFA-COD] could be produced in a synthetic or nutrient-poor stream [2];

Yield<sub>biomass</sub>: a typical 0.05 biomass yield for microbial growth [3] [g biomass-COD/g VFA-COD];

So the overall recovery percentage of PHA was estimated to be 58% (= (1-0.05)\*0.61\*100%) to 65% (= (1-0.05)\*0.68\*100%).

### Calculations S2. The overall yields of VFAs from PHA hydrolysis

$$Yield_{VFA} = \frac{C_{VFA}}{C_{original\ PHA}} * (COD_{hydrolysates} / COD_{start\ of\ fermentation}) \quad [g\ VFA / g\ PHA] \quad (S2)$$

COD<sub>hydrolysates</sub>: 16.3 [g COD/L];

COD<sub>start of fermentation</sub>: 4 [g COD/L];

So the Yield acetate was  $0.07 = (1.71/100) * (16.3/4)$  [g acetate/g PHA], and Yield butyrate was  $0.049 = (1.20/100) * (16.3/4)$  [g butyrate/g PHA].

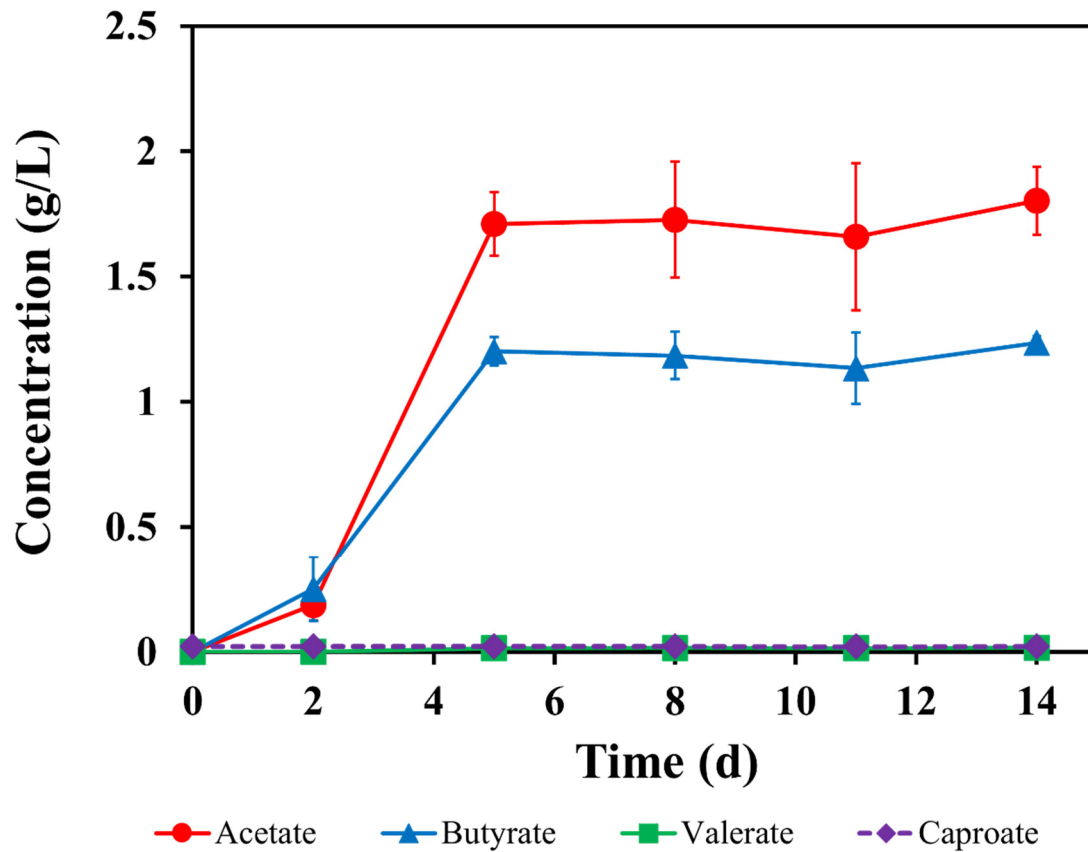

**Figure S2.** Volatile fatty acids distribution during mixed culture fermentation of PHA. The visible error bars represent the standard deviation of the triplicate experiments.

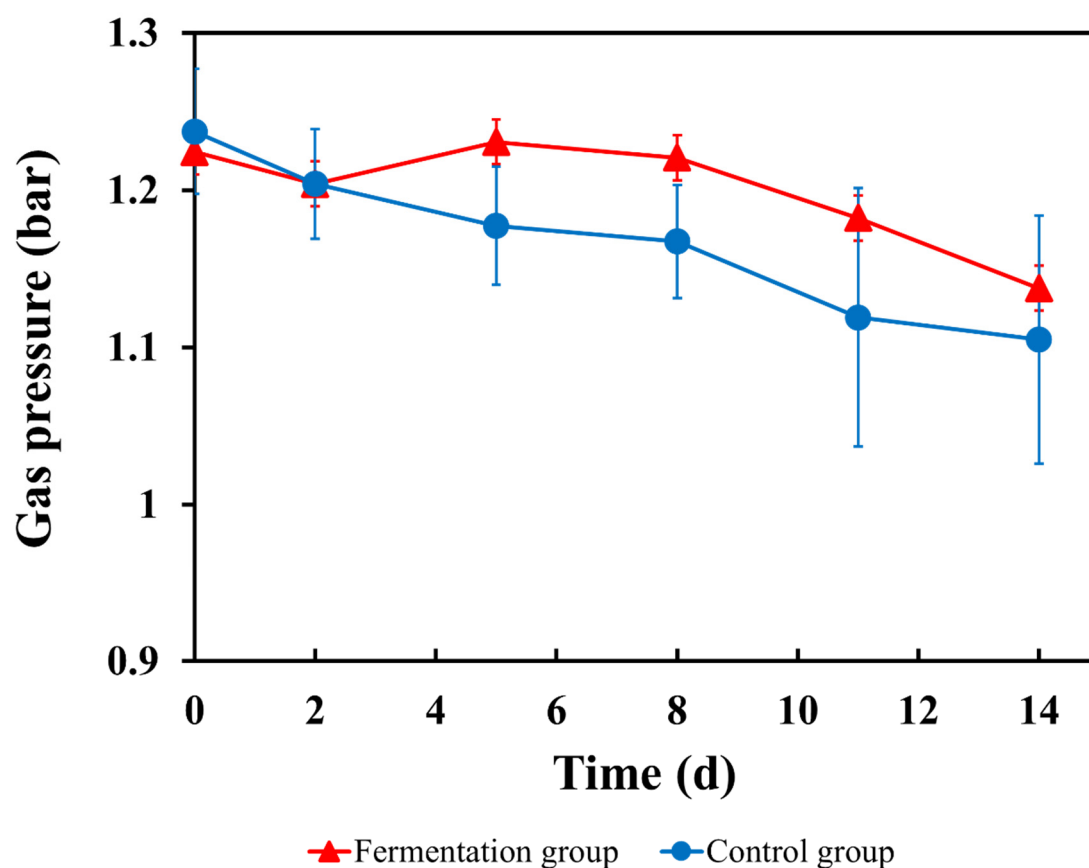

**Figure S3.** Gas pressure measured during mixed culture fermentation of PHA. The visible error bars represent the standard deviation of the triplicate experiments.

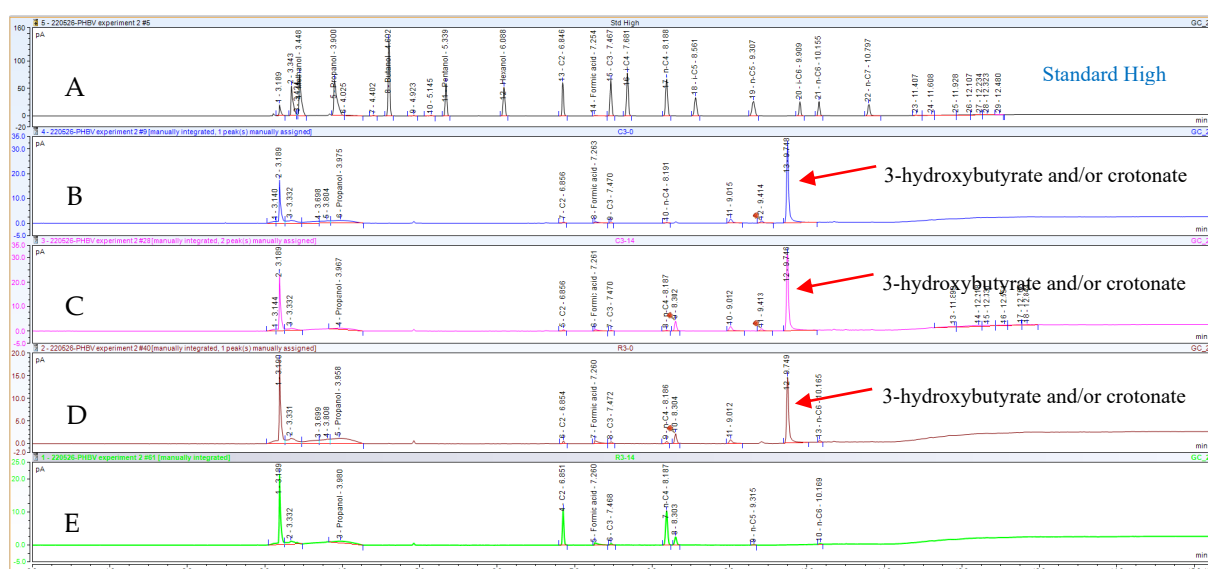

**Figure S4.** Carboxylates measurement in a gas chromatograph (GC) of selected samples. **Note:** A is the standard curve in high-concentration solution; B is the curve of the start experiment of the control group; C is the curve of the end experiment of the control group; D is the curve of the start experiment of the fermentation group; E is the curve of the end experiment of fermentation group.

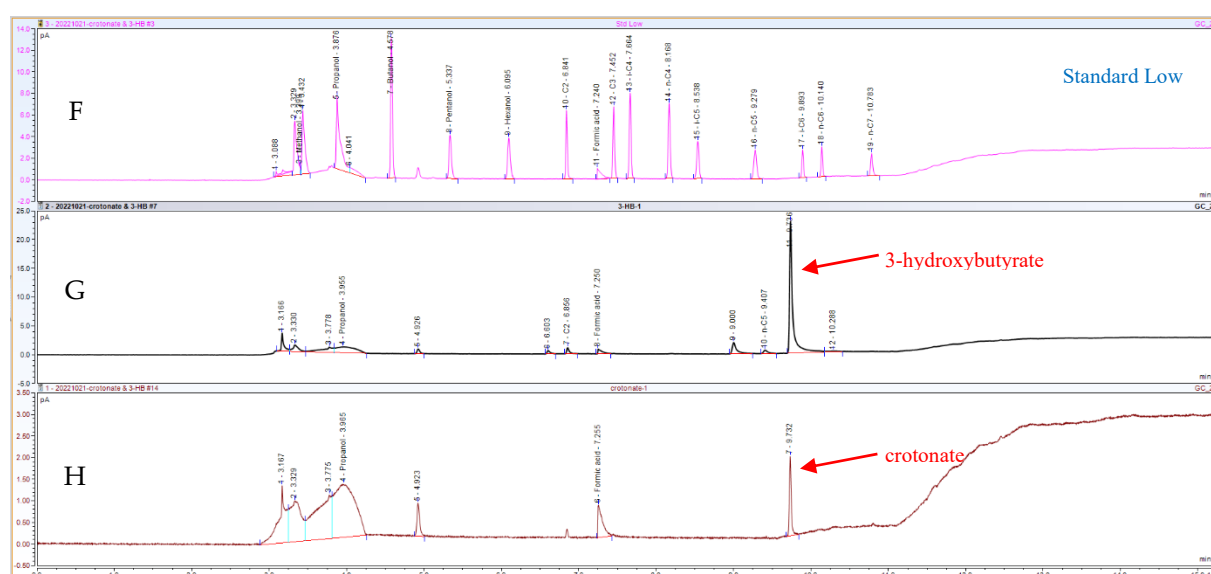

**Figure S5.** Crotonate and 3-hydroxybutyrate (3-HB) measurement in a gas chromatograph (GC). **Note:** F is the standard curve in low-concentration solution; G is the curve of 500 mg/L 3-hydroxybutyrate; H is the curve of 10 mg/L crotonate. G and H are selected from duplicate samples.

Compared with the retention time of the peaks of quantitatively measured crotonate and 3-hydroxybutyrate in groups G and H, here the peaks showed with red rows in groups B–D indicating that there were some crotonate and/or 3-hydroxybutyrate produced from PHBV hydrolysis, and in group E, no peak at the same time as showed in B to D, this can qualitatively identify the present crotonate and/or 3-hydroxybutyrate and the conversion of them into acetate and butyrate (both peaks of these two carboxylates increased apparently).

**Table S4.** Compositions of gas in headspace measured at the end of fermentation.

| Group          | O <sub>2</sub> (%) | N <sub>2</sub> (%) | CO <sub>2</sub> (%) | H <sub>2</sub> (%) | CH <sub>4</sub> (%) |
|----------------|--------------------|--------------------|---------------------|--------------------|---------------------|
| Fermentation 1 | 0.22               | 84.7               | 13.7                | 0.010              | 0                   |
| Fermentation 2 | 0.21               | 86.3               | 12.7                | 0.588              | 0                   |
| Fermentation 3 | 0.23               | 85.7               | 13.0                | n.a.               | 0                   |
| Control 1      | 0.17               | 96.9               | 10.1                | n.a.               | 0                   |
| Control 2      | 0.17               | 90.4               | 8.96                | n.a.               | 0                   |
| Control 3      | 0.21               | 90.5               | 8.66                | n.a.               | 0                   |

Note: n.a. means ‘not available’.

## References

- García-Depraect, O.; Lebrero, R.; Rodríguez-Vega, S.; Bordel, S.; Santos-Beneit, F.; Martínez-Mendoza, L.J.; Aragão Börner, R.; Börner, T.; Muñoz, R. Biodegradation of bioplastics under aerobic and anaerobic aqueous conditions: Kinetics, carbon fate and particle size effect. *Bioresour. Technol.* **2022**, *344*, 126265. <https://doi.org/10.1016/j.biortech.2021.126265>.
- Estévez-Alonso, Á.; Pei, R.; van Loosdrecht, M.C.M.; Kleerebezem, R.; Werker, A. Scaling-up microbial community-based polyhydroxyalkanoate production: status and challenges. *Bioresour. Technol.* **2021**, *327*, 124790. <https://doi.org/10.1016/j.biortech.2021.124790>.
- Geleti, D.; Hailemariam, M.; Mengistu, A.K.; Tolera, A. Biomass yield potential and nutritive value of selected Alfalfa (*Medicago sativa* L.) cultivars grown under tepid to cool sub-moist agro-ecology of Ethiopia. *E3 J. Agric. Res. Dev.* **2014**, *4*, 007–014.
